# Supplementary material
Source: PubMed Central journal article supplement (PMC3592052)
Supplement: JCM.01917-12_zjm999092321so1.pdf [file JCM.01917-12_zjm999092321so1.pdf]

**Supplement table:** phenotypic and genetic characteristics of pneumococci causing meningitis in England and Wales (2004-2009)

| Serotypes                                     | No isolates | NO STs | Sequence types (no isolates)                                                                                                                                                                                                                                                                                        |
|-----------------------------------------------|-------------|--------|---------------------------------------------------------------------------------------------------------------------------------------------------------------------------------------------------------------------------------------------------------------------------------------------------------------------|
| <i>Serotypes included in PCV7</i>             |             |        |                                                                                                                                                                                                                                                                                                                     |
| 4                                             | 32          | 9      | ST205(8), ST206(2), ST244(1), ST246(14), ST247(3), ST2484(1), ST3886(1), ST3894(1), ST4299(1)                                                                                                                                                                                                                       |
| 6B                                            | 73          | 29     | ST96(1), ST138(15), ST146(4), ST170(1), ST176(25), ST179(1), ST315(2), ST400(1), ST402(2), ST468(1), ST469(1), ST1645(1), ST1720(1), ST2456(1), ST2457(1), ST2465(1), ST2496(1), ST2810(1), ST3443(1), ST3482(2), ST3486(1), ST3505(1), ST3506(1), ST3733(1), ST3738(1), ST3742(1), ST3900(1), ST3909(1), ST4200(1) |
| 9V                                            | 35          | 8      | ST156(5), ST162(20), ST163(3), ST334(1), ST1630(3), ST1697(1), ST3479(1), ST4345(1)                                                                                                                                                                                                                                 |
| 14                                            | 79          | 10     | ST9(43), ST15(3), ST24(2), ST63(1), ST124(25), ST162(1), ST3448(1), ST3719(1), <b>ST4327(1)*</b> , ST4359(1)                                                                                                                                                                                                        |
| 18C                                           | 73          | 26     | ST113(35), ST114(7), ST116(5), ST121(3), ST308(1), ST496(1), ST638(1), ST697(2), ST716(1), ST1073(1), ST1233(1), ST1381(1), ST1686(1), ST1711(1), ST1719(1), ST2239(1), ST2453(1), ST2512(1), ST3469(1), ST3470(1), ST3471(1), ST3876(1), ST3884(1), ST4341(1), ST4342(1), ST4350(1)                                |
| 19F                                           | 76          | 26     | ST81(1), ST87(1), ST162(33), ST177(4), ST179(4), ST251(2), ST309(4), ST420(4), ST422(3), ST426(1), ST474(1), ST643(1), ST654(2), ST688(1), ST878(1), ST1258(1), ST1340(2), ST2100(1), ST2307(1), ST2439(1), ST2495(1), ST2525(1), ST3459(1), ST3731(1), ST3897(1), ST4351(2)                                        |
| 23F                                           | 52          | 9      | ST33(1), ST36(22), ST311(22), ST1682(2), ST1852(1), ST3739(1), ST3883(1), ST3903(1), ST4293(1)                                                                                                                                                                                                                      |
| <i>Additional serotypes included in PCV13</i> |             |        |                                                                                                                                                                                                                                                                                                                     |
| 1                                             | 46          | 8      | ST227(9), ST306(31), ST350(1), ST405(1), ST433(1), ST618(1), ST2126(1), ST3446(1)                                                                                                                                                                                                                                   |
| 3                                             | 57          | 3      | ST180(55), ST232(1), ST233(1)                                                                                                                                                                                                                                                                                       |
| 5                                             | 4           | 1      | ST289(4)                                                                                                                                                                                                                                                                                                            |
| 6A                                            | 43          | 18     | ST42(1), ST65(21), ST176(1), ST327(4), ST395(1), ST396(1), ST398(1), ST460(3), ST473(1), ST681(1), ST1716(1), ST1752(1), ST1862(1), ST2528(1), ST3449(1), ST3513(1), ST3880(1), ST4300(1)                                                                                                                           |
| 7F                                            | 76          | 7      | ST191(70), ST1176(1), ST2470(1), ST2522(1), ST3462(1), ST3490(1), ST3544(1)                                                                                                                                                                                                                                         |
| 19A                                           | 41          | 12     | ST199(24), ST274(1), ST276(2), ST416(3), ST419(2), ST450(1), ST1201(2), ST1756(2), ST2464(1), ST3492(1), ST3499(1), ST3914(1)                                                                                                                                                                                       |
| <i>Serotypes not included in any PCVs</i>     |             |        |                                                                                                                                                                                                                                                                                                                     |
| 10A                                           | 11          | 7      | ST97(3), ST461(2), ST1551(2), ST2068(1), ST4084(1), ST4207(1), ST4481(1)                                                                                                                                                                                                                                            |
| 11A                                           | 8           | 1      | ST62(8)                                                                                                                                                                                                                                                                                                             |
| 12A                                           | 1           | 1      | ST3122(1)                                                                                                                                                                                                                                                                                                           |
| 12B                                           | 3           | 1      | ST218(3)                                                                                                                                                                                                                                                                                                            |
| 12F                                           | 36          | 4      | ST218(31), ST220(1), ST2964(3), ST3906(1)                                                                                                                                                                                                                                                                           |
| 13                                            | 1           | 1      | ST574(1)                                                                                                                                                                                                                                                                                                            |
| 15A                                           | 5           | 3      | ST63(3), ST410(1), ST2613(1)                                                                                                                                                                                                                                                                                        |
| 15B                                           | 13          | 4      | ST193(1), ST199(7), ST411(1), ST2220(4)                                                                                                                                                                                                                                                                             |

|     |    |    |                                                                                                                                |
|-----|----|----|--------------------------------------------------------------------------------------------------------------------------------|
| 15C | 15 | 5  | ST199(7), ST1262(3), ST2220(3), ST3934(1), ST4361(1)                                                                           |
| 16F | 1  | 1  | ST414(1)                                                                                                                       |
| 17F | 5  | 2  | ST392(4), ST4358(1)                                                                                                            |
| 18A | 2  | 2  | ST1232(1), ST4353(1)                                                                                                           |
| 20  | 13 | 4  | ST235(10), ST591(1), ST4294(1), ST4328(1)                                                                                      |
| 22F | 41 | 7  | ST100(1), ST433(22), ST698(12), ST819(3), ST1470(1), ST4325(1), ST4334(1)                                                      |
| 23A | 12 | 4  | ST190(1), ST436(2), ST438(8), ST4362(1)                                                                                        |
| 23B | 10 | 1  | ST439(10)                                                                                                                      |
| 24F | 2  | 2  | ST72(1), ST3461(1)                                                                                                             |
| 25A | 1  | 1  | ST393(1)                                                                                                                       |
| 27  | 9  | 2  | ST1475(8), ST2507(1)                                                                                                           |
| 28A | 2  | 2  | ST225(1), <b>ST4327(1)*</b>                                                                                                    |
| 28F | 1  | 1  | ST546(1)                                                                                                                       |
| 31  | 2  | 2  | ST444(1), ST568(1)                                                                                                             |
| 32A | 1  | 1  | ST4296(1)                                                                                                                      |
| 32F | 1  | 1  | ST3736(1)                                                                                                                      |
| 33C | 1  | 1  | ST4326(1)                                                                                                                      |
| 33F | 23 | 6  | ST60(2), ST100(7), ST673(11), ST3740(1), ST3741(1), ST3916(1)                                                                  |
| 34  | 2  | 1  | ST547(2)                                                                                                                       |
| 35B | 4  | 2  | ST452(3), ST558(1)                                                                                                             |
| 35F | 13 | 3  | ST446(7), ST1368(1), ST1635(5)                                                                                                 |
| 37  | 2  | 1  | ST447(2)                                                                                                                       |
| 38  | 8  | 1  | ST393(8)                                                                                                                       |
| 6C  | 19 | 11 | ST395(1), ST398(1), ST1150(1), ST1390(3), ST1600(1), ST1640(1), ST1692(7), ST1714(1), ST1715(1), ST3507(1), ST4324(1)          |
| 7A  | 1  | 1  | ST191(1)                                                                                                                       |
| 7C  | 1  | 1  | ST1201(1)                                                                                                                      |
| 8   | 58 | 12 | ST53(41), ST404(1), ST698(1), ST944(4), ST1110(3), ST2234(2), ST2502(1), ST3723(1), ST4301(1), ST4312(1), ST4338(1), ST4357(1) |
| 9N  | 15 | 3  | ST66(7), ST405(7), ST3732(1)                                                                                                   |
